# Supplementary material
Source: PubMed Central journal article supplement (PMC1201606)

**A**

without NN effect

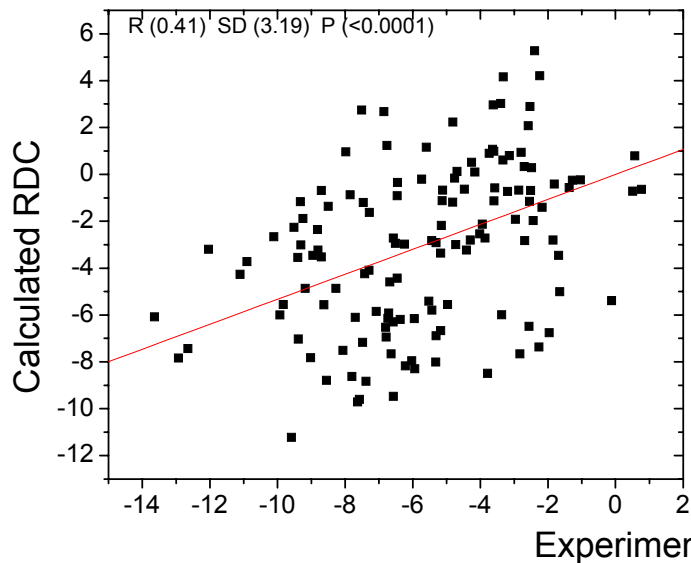**B**

with NN effect

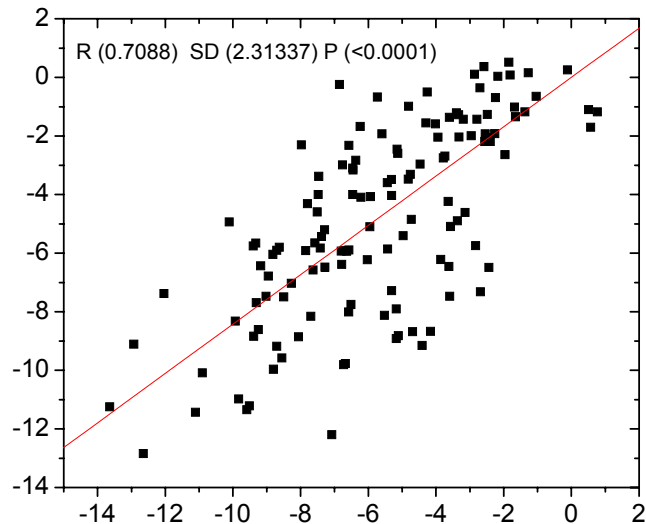

Supplement: pnas_0506078102_2.pdf [file pnas_0506078102_2.pdf]
