# Supplementary material
Source: PubMed Central journal article supplement (PMC1201606)
Supplement: pnas_0506078102_4.pdf [file pnas_0506078102_4.pdf]

**A**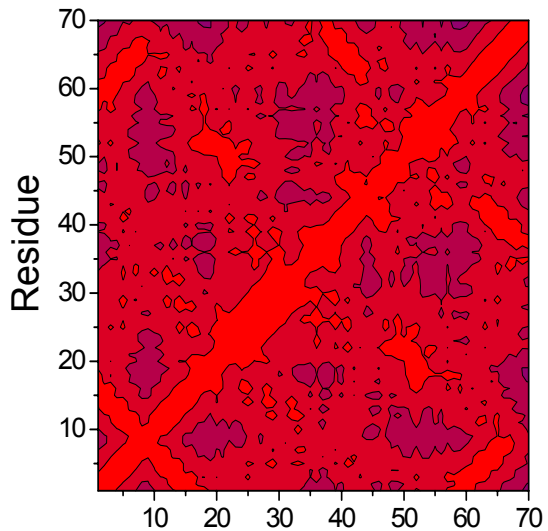**B**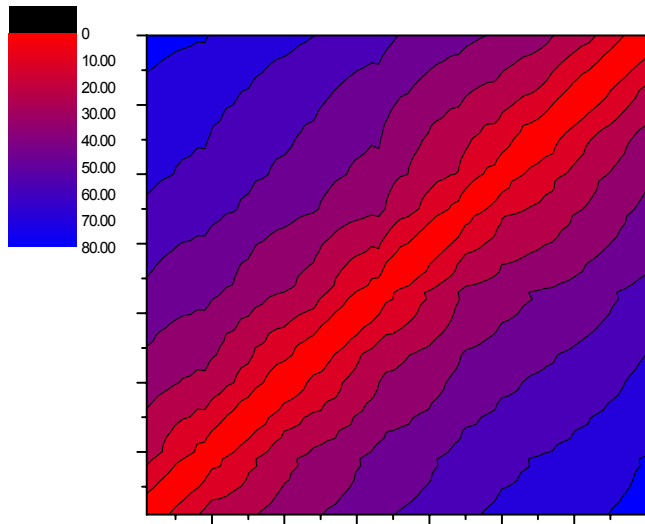

Residue
